# Supplementary material for: A new model of crystal packingElectronic supplementary information (ESI) available: equation used to calculate goodness of fit, mean goodness of fit values calculated for Z = 4 datasets, results of pattern assignment for Z = 2 and Z = 8 structures, examples of unit cell dimension calculations. See http://www.rsc.org/suppdata/cc/b3/b310873b/
Source: Royal Society of Chemistry journal article supplement (doi:10.1039/b310873b), 2003-01-01
Supplement: b310873b.doc [file b310873b.doc]

**Supplementary Information**

S1

A new model of crystal packing.

Elna Pidcock and W.D. Sam Motherwell

Cambridge Crystallographic Data Centre, 12 Union Road, Cambridge, CB2 1EZ, UK.

The equation for calculating the goodness of fit, expressed as a percentage value is given below:

where (pattern) identifies the pattern, cik are the "target" pattern coefficients for the pattern, the cek are the calculated pattern coefficients for each structure, and k = 1-36, the number of permutations for each pattern.

Table 1. Mean Goodness of Fit calculated for each pattern type for Z = 4 structures.

| Space Group | Mean GoFpattern | | | | | |
| --- | --- | --- | --- | --- | --- | --- |
|  | 221(lm) | 221(mm) | 221(sm) | 114(lm) | 114(mm) | 114(sm) |
| P21/c | 12.6 | 13.1 | 12.8 | 18.1 | 12.3 | 12.0 |
| P212121 | 12.7 | 12.6 | 12.7 | 15.1 | 11.4 | 11.0 |
| C2/c | 14.0 | 10.9 | 11.4 | - | 9.9 | 13.4 |

Table 2. Distribution of unit cells over 112 packing patterns for Z = 2structures.

| Space Group | Total Obs. | Number of structures assigned to packing pattern | | |
| --- | --- | --- | --- | --- |
|  |  | 112(lm) | 112(mm) | 112(sm) |
| P-1 | 5949 | 121 | 640 | 5188 |
| P21 | 6636 | 398 | 1609 | 4629 |
| P21/c | 2366 | 154 | 637 | 1575 |

Table 3. Distribution of unit cells over packing pattern 421 for Z = 8 structures.

S2

| Space Group | Total Obs. | Number of structures assigned to packing pattern | | | | | |
| --- | --- | --- | --- | --- | --- | --- | --- |
|  |  | 421(sml) | 421(slm) | 421(msl) | 421(mls) | 421(lsm) | 421(lms) |
| C2/c | 2870 | 1244 | 726 | 409 | 341 | 101 | 49 |

Remaining 930 structures in C2/c with Z = 8 are assigned to the 222 packing pattern. No structure belongs to the 118 packing pattern

**Example calculations of unit cell dimensions from molecular dimensions**.

Five structures have been chosen from the dataset of structures for which Z = 4 and which have been assigned to the pattern type 221(lm). All the structures belong to space group P21/c. These structures have been chosen as they represent a good fit to the proposed model and as such provide the basis of a good demonstration of how unit cells dimensions are calculated from molecular dimensions. There are structures that belong to the above dataset which do not represent such a good fit to the proposed model. The calculation of the most appropriate pattern coefficients for Z = 1, 2, 4 and 8 structures will the subject of a more detailed publication.

Table 4 shows the results from the calculation of cell dimensions from molecular dimensions. The structures belong to pattern type 221(lm), thus:

Cell dimensions = lm x 0.82, mm x 1.64 and sm x 1.64

Table 4. Unit cell dimensions calculated from the application of the 221(lm) pattern to molecular dimensions.

| CSD Refcode | Molecular dimensions (Å) | | | Predicted cell dimensions (Å) | | | Experimental cell dimensions (Å) | | |
| --- | --- | --- | --- | --- | --- | --- | --- | --- | --- |
|  | l | m | s |  |  |  | a | b | c |
| BANGOM02 | 14.17 | 7.59 | 4.76 | 12.5 | 7.8 | 11.6 | 12.10 | 7.37 | 12.89 |
| CUFNEW | 9.68 | 9.34 | 7.44 | 7.9 | 12.2 | 15.3 | 8.67 | 12.16 | 15.24 |
| HOXTHD | 11.82 | 7.64 | 6.08 | 10.0 | 9.7 | 12.5 | 10.43 | 10.19 | 13.17 |
| ICOTOJ | 13.23 | 9.83 | 4.17 | 6.8 | 16.1 | 10.8 | 7.26 | 16.13 | 11.47 |
| KAMVAV | 14.21 | 7.64 | 6.90 | 12.5 | 11.7 | 12.5 | 12.51 | 11.1 | 12.97 |
